# Supplementary material for: CVE: an R package for interactive variant prioritisation in precision oncology
Source: PubMed Central journal article supplement (PMC5445311; doi:10.1186/s12920-017-0261-6), 2017-05-25
Supplement: 12920_2017_261_MOESM2_ESM.pdf [file 12920_2017_261_MOESM2_ESM.pdf]

Table S2 Input variant format of CVE. The input file needs to be provided as a comma-separated (csv) file containing the location information chromosome, start, end, as well as the information about the reference and the observed allele in the displayed order.

| chr | start     | end       | reference allele | observed allele |
|-----|-----------|-----------|------------------|-----------------|
| 1   | 120437782 | 120437783 | GG               | TT              |
| 1   | 145273405 | 145273406 | CG               | AT              |
| 1   | 153963239 | 153963239 | C                | T               |
