# Supplementary material for: CVE: an R package for interactive variant prioritisation in precision oncology
Source: PubMed Central journal article supplement (PMC5445311; doi:10.1186/s12920-017-0261-6), 2017-05-25

A

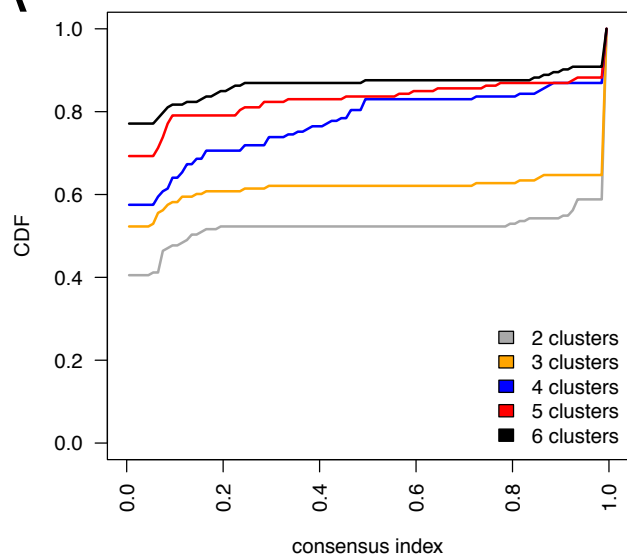

B

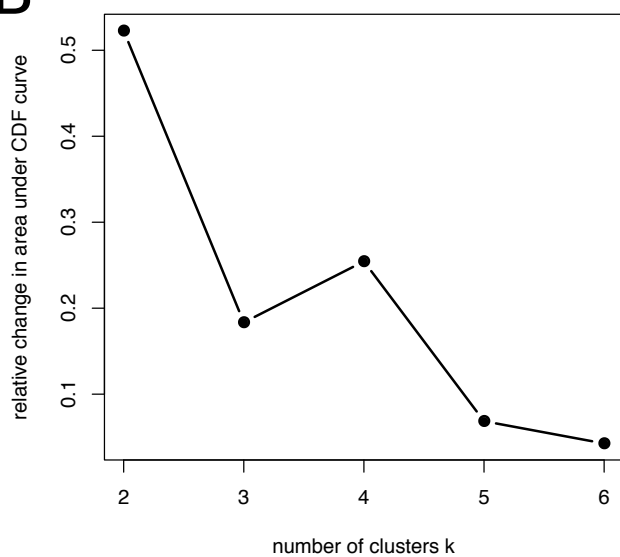

C

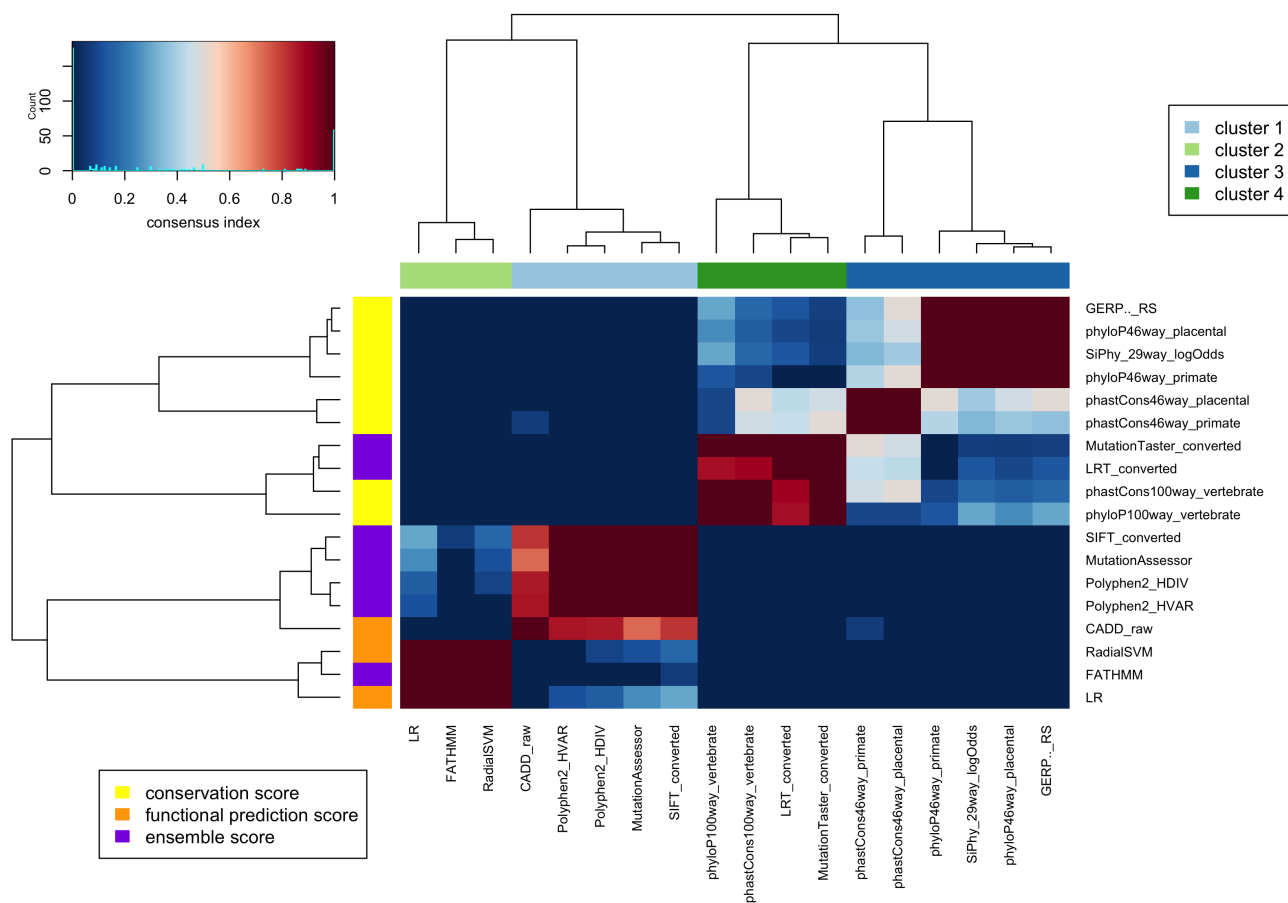

Supplement: 12920_2017_261_MOESM3_ESM.pdf [file 12920_2017_261_MOESM3_ESM.pdf]
