# Supplementary material for: CVE: an R package for interactive variant prioritisation in precision oncology
Source: PubMed Central journal article supplement (PMC5445311; doi:10.1186/s12920-017-0261-6), 2017-05-25
Supplement: 12920_2017_261_MOESM6_ESM.pdf [file 12920_2017_261_MOESM6_ESM.pdf]

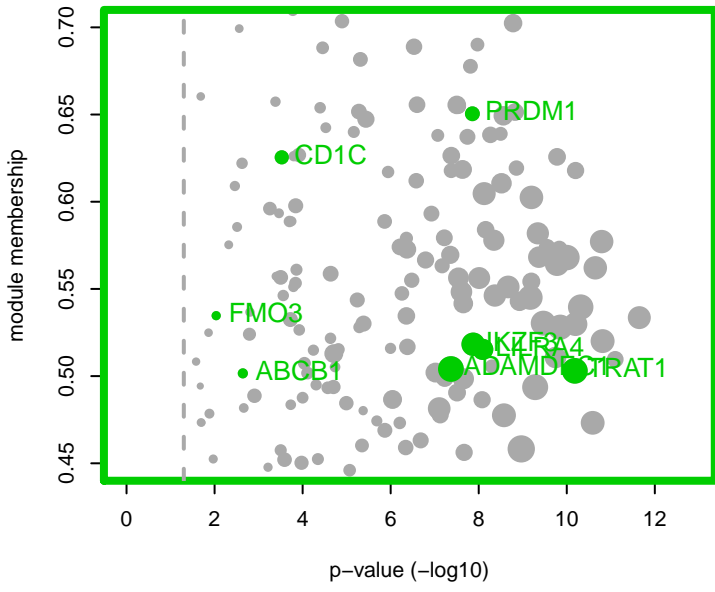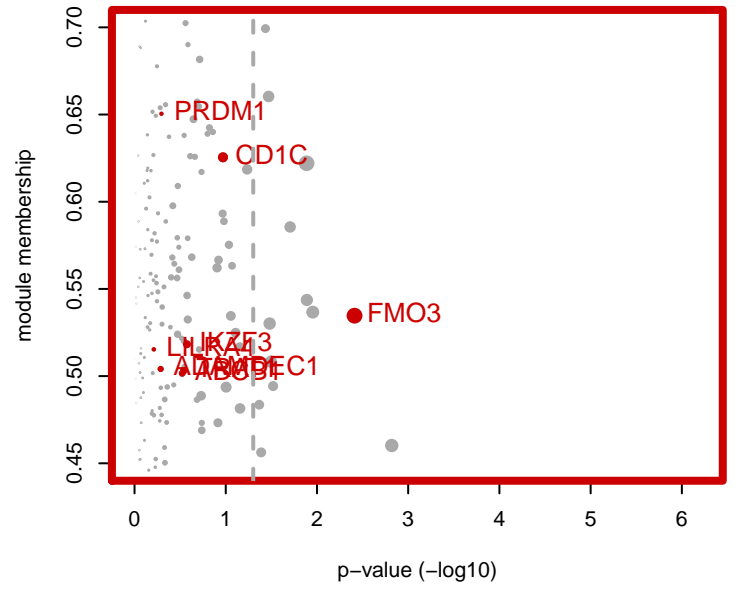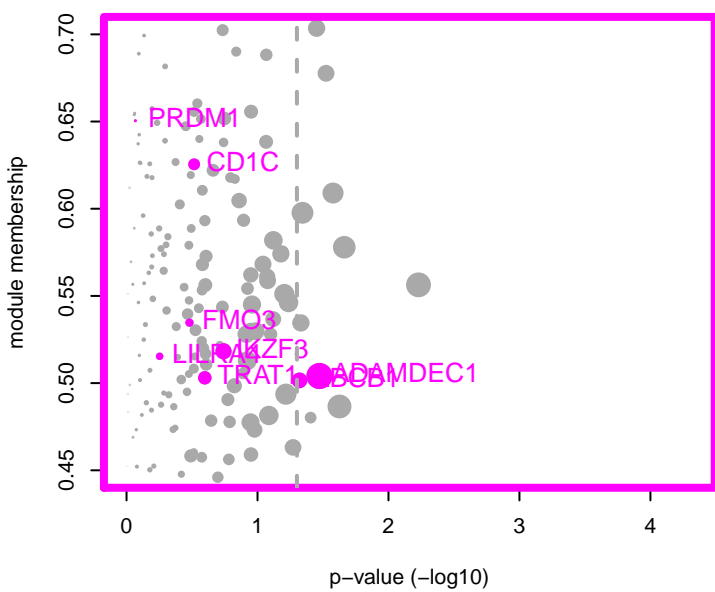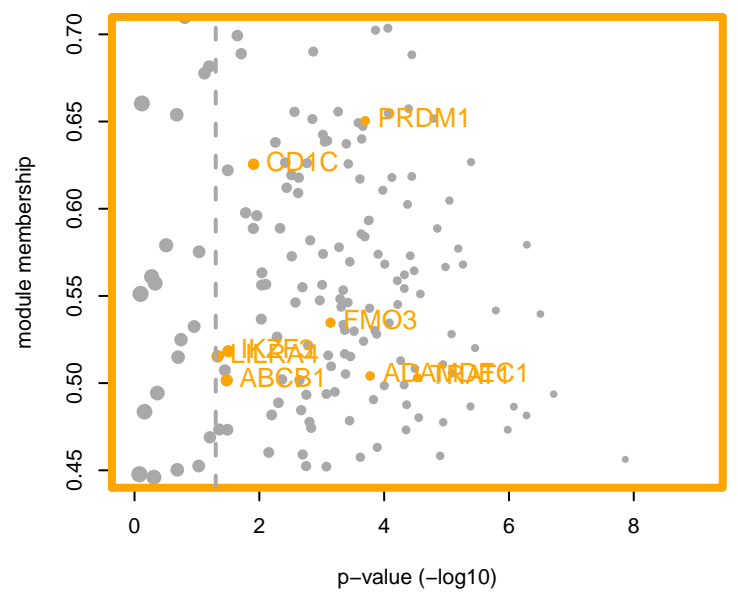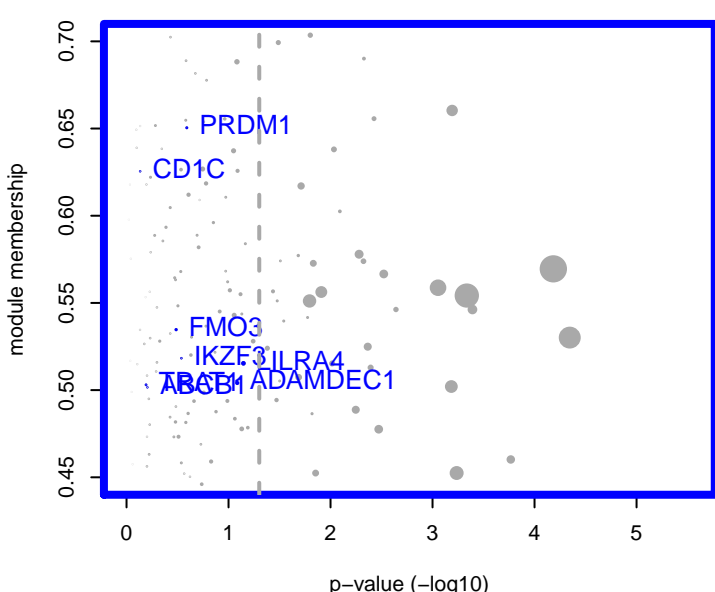

- gene significance measure
- lymphocyte score
  - primary vs metastasis
  - UV signature
  - post-accession survival
  - vemurafenib resistance

- effect size
- greater
  - smaller

prioritised variant genes module 3

ABCB1 – multidrug resistance protein  
 ADAMDEC1 – desintegrin metalloproteinase  
 CD1C – T-cell surface glycoprotein  
 FMO3 – involved in oxidative metabolism of xenobiotics  
 IKZF3 – transcription factor of lymphocyte development  
 LILRA4 – leukocyte immunoglobulin-like receptor  
 PRDM1 – repressor of beta-interferon expression  
 TRAT1 – T-cell receptor transmembrane adaptor
